# Supplementary material for: Tailoring an HSO4− anion hybrid receptor based on a phenazine derivative
Source: Royal Society of Chemistry journal article supplement (doi:10.1039/d0pp00159g), 2020-08-07
Supplement: d0pp00159g1.pdf [file d0pp00159g1.pdf]

## SUPPORTING INFORMATION

### **Tailoring the $\text{HSO}_4^-$ anion hybrid receptor based on phenazine derivative**

Xiao-Ni Qi <sup>a</sup>, Hong-Qiang Dong <sup>a</sup>, Hai-Long Yang <sup>a</sup>, Wen-Jun Qu <sup>a</sup>, You-Ming Zhang <sup>a</sup>, Hong Yao <sup>a</sup>,  
Qi Lin <sup>a</sup> and Tai-Bao Wei <sup>a\*</sup>

Contribution from:

<sup>a</sup> Key Laboratory of Eco-functional Polymer Materials of the Ministry of Education, Key  
Laboratory of Eco-environmental Polymer Materials of Gansu Province, College of  
Chemistry and Chemical Engineering, Northwest Normal University, Lanzhou, Gansu, PR  
China

## TABLE OF CONTENTS

### The general procedure for fluorescence spectra experiments

**Scheme S1** Synthesis compound PD and control compound D-1.

**Fig. S1** The ESI-MS of PD:  $[M+H]^+ = 329.10326$ .

**Fig. S2** The response fluorescence intensity PD (20  $\mu$ M) were present in different solvent solution.

**Fig. S3** The response fluorescence intensity PD (20  $\mu$ M) at different water volume fractions (Vol%).

**Fig S4.** Fluorescence response of the PD ( $2.0 \times 10^{-4}$  M) in the presence of various solvent and different times (Ex = 450 nm, 0 h, 12 h, 24 h, 48 h, 72 h, 96 h)

**Fig S5.**  $^{13}\text{C}$  NMR spectrum (150 MHz, DMSO- $d_6$ , 293 K) of PD

**Fig. S6** Fluorescence response of the PD- $\text{HSO}_4^-$  in the presence of various cations From 1 to 15: PD, PD- $\text{HSO}_4^-$ ,  $\text{Zn}^{2+}$ ,  $\text{Cd}^{2+}$ ,  $\text{Hg}^{2+}$ ,  $\text{Co}^{2+}$ ,  $\text{Ni}^{2+}$ ,  $\text{Al}^{3+}$ ,  $\text{Fe}^{3+}$ ,  $\text{Cu}^{2+}$ ,  $\text{Pb}^{2+}$ ,  $\text{Mg}^{2+}$ ,  $\text{Ba}^{2+}$ ,  $\text{Cr}^{3+}$  in three solvent system DMSO/Ethanol/ $\text{H}_2\text{O}$  (1:8:1, v/v/v) solution. Inset: Histogram showing the change of the solution of PD- $\text{HSO}_4^-$  in three solvent system DMSO/Ethanol/ $\text{H}_2\text{O}$ (1:8:1, v/v/v) solution after addition other cations(25equiv.).

**Fig. S7** Fluorescence response of the PD- $\text{HSO}_4^-$  in the presence of various anions (25equiv). From 1 to 20: PD, PD- $\text{HSO}_4^-$ ,  $\text{ClO}_4^-$ ,  $\text{HPO}_4^-$ ,  $\text{F}^-$ ,  $\text{Cl}^-$ ,  $\text{Br}^-$ ,  $\text{I}^-$ ,  $\text{AcO}^-$ ,  $\text{H}_2\text{PO}_4^-$ ,  $\text{CN}^-$ ,  $\text{SCN}^-$ ,  $\text{NO}_3^-$ ,  $\text{SO}_3^{2-}$ ,  $\text{NO}_2^-$ ,  $\text{P}_2\text{O}_7^{4-}$ ,  $\text{PO}_4^{3-}$ ,  $\text{C}_2\text{O}_4^{2-}$ ,  $\text{S}_2\text{O}_3^{2-}$ ,  $\text{CO}_3^{2-}$ ) in three solvent system DMSO/Ethanol/ $\text{H}_2\text{O}$  (1:8:1, v/v/v) solution anions.

**Fig. S8** Mass spectrum of PD- $\text{HSO}_4^-$  complex (ESI-MS).

**Fig. S9** IR spectrum of PD- $\text{HSO}_4^-$  complex.

**Figure S10** The pH-Dependent fluorescence responses of PD (pH from 1 to 13).

**Fig S11** The linear fitting equation and the limitation of PD to the  $\text{HSO}_4^-$ .

**Fig S12** A diagrammatic figure of electron density distribution.

### **The general procedure for fluorescence spectra experiments**

The solution of sensor PD ( $2.0 \times 10^{-5}$  M) in DMSO/ethanol (1:4,v/v) was prepared and stored in a dry atmosphere. The solution was used for all specification studies, all analytical substrates ( $1.0 \times 10^{-2}$  M) were prepared in deionized water with HEPES buffer solutions (pH=7.2). All fluorescence spectra were performed in DMSO/ethanol/H<sub>2</sub>O (1:8:1,v/v/v) solution via Shimadzu RF-5301 spectrometer.

### **Preparation of Starting Materials**

o-phenylenediamine(1a), 3,4-dihydroxybenzaldehyde(1b) and benzaldehyde (1c) were commercially available. 2,3-diamino-phenazine 2a and 3a was prepared according to literature[1].

### **Synthesis compound PD and D-1**

Intermediate(2a) 2,3-diamino-phenazine (0.42g, 2mmol), 3,4-dihydroxybenzaldehyde (0.35g, 2.5mmol) and acetic acid (1-2mL) as the catalyst were mixed in hot absolute DMF (20 mL).The solution was mechanically stirred for 24 hours under continuous refluxing conditions, then the dark brown precipitate was achieved by filtrating the mixture after cooling to room temperature, finally alternately washed with hot absolute ethanol and deionized water five times, then recrystallized with DMF/H<sub>2</sub>O(5:3,v/v) to get dark brown powdery product compound PD. The

control compounds D-1 was synthesized according to the reported literature[2,3]. The synthetic diagram could be shown in Scheme S1.

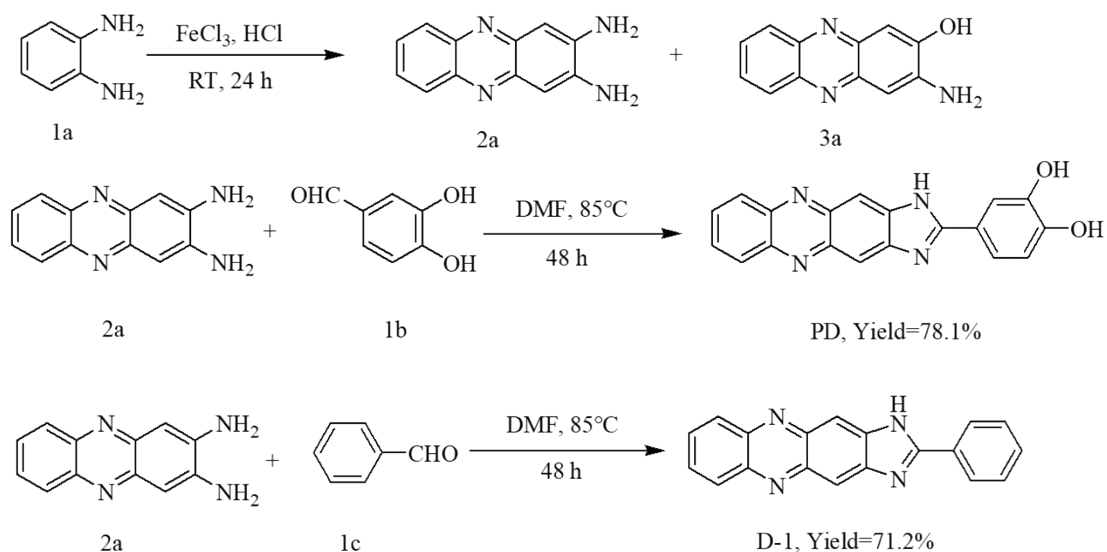

Scheme S1 Synthesis of compound PD and control compound D-1

### Solvent screening

At firstly, we investigated the various solvent effect on the fluorescence intensity and lifetime of the PD, including water, methanol, ethanol, acetone, dichloromethane (DCM), tetrahydrofuran (THF), dimethyl sulfoxide (DMSO), dimethyl formamide (DMF), ethyl acetate, and acetonitrile. As shown in Fig. S1, the PD ( $2.0 \times 10^{-4}$  M) could completely dissolve in Dimethyl sulfoxide and N, N-Dimethyl acrylamide and partly dissolve in other different solvent together with some apparent precipitation. It is a pity that no fluorescence also been found in the water and dichloromethane (DCM) solvent. However, the maximum fluorescence emission intensity and the longer fluorescence lifetime of the PD appeared in the ethanol solvent as shown in Fig.S 2. According to the previous research works, taking the preferable solubility and fluorescence

characteristic into consideration to choose the ethanol as the solvent under the help of DMSO as the solubilizer. In view of water system could be beneficial to the interaction between the receptor and anions, the results suggested that with the water content increasing, the fluorescence emission intensity at 535 nm reduced gradually. The emission intensity was maximized when the water content reached 10%. Finally, we selected the minimal integer fraction DMSO/ethanol/H<sub>2</sub>O (1:8:1 v/v/v) system as the optimal mixed solvent as shown in Fig.S3. Hence, we carried out a series of experiments in DMSO/ethanol/H<sub>2</sub>O (1:8:1 v/v/v) HEPES buffered solution (pH 7. 2).

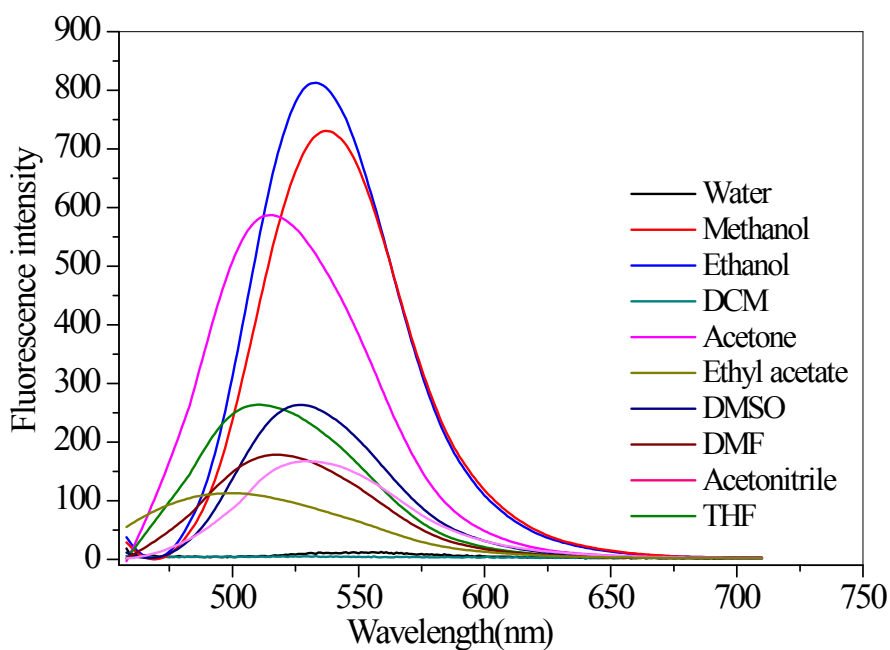

Figure S1 The response fluorescence intensity PD (20  $\mu$ M) were present in different solvent solution. Insert : Dissolve situation of PD appeared in various solvent.

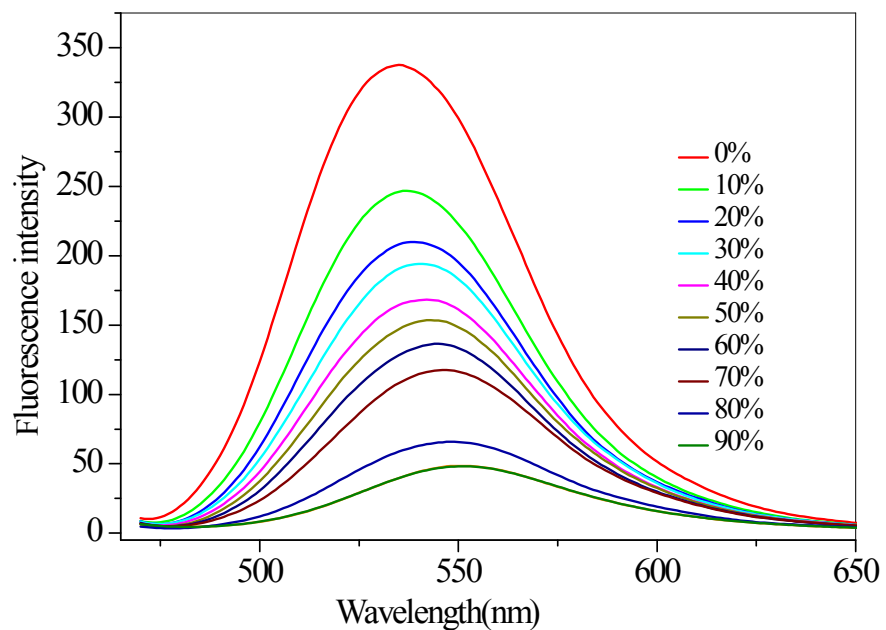

Figure S 2 The response fluorescence intensity PD (20 μM) at different water volume fractions (Vol%)Insert From 1 to 10:0,10%,20%,30%,40%,50%,60%,70%,80%,90%.

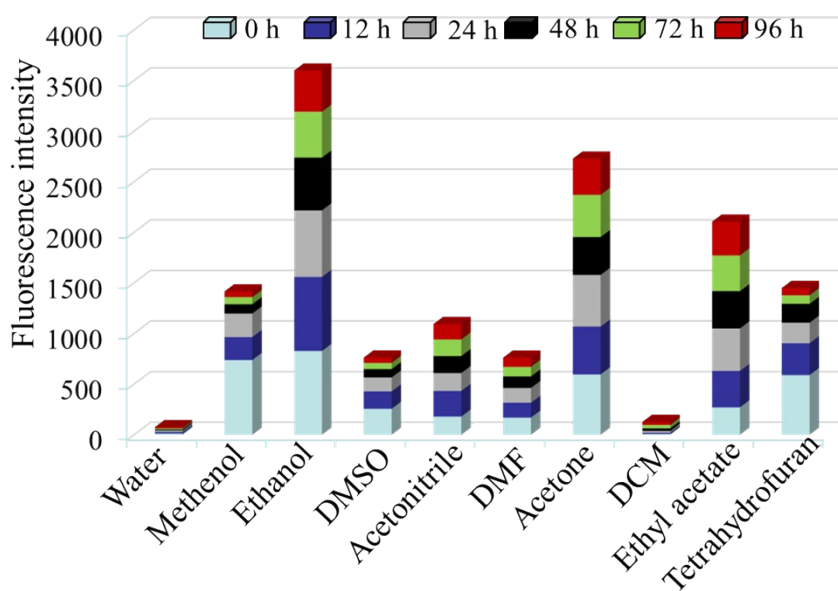

Fig S3. Fluorescence response of the PD ( $2.0 \times 10^{-4}$  M) in the presence of various solvent and different times (Ex = 450 nm, 0 h, 12 h, 24 h, 48 h, 72 h, 96 h)

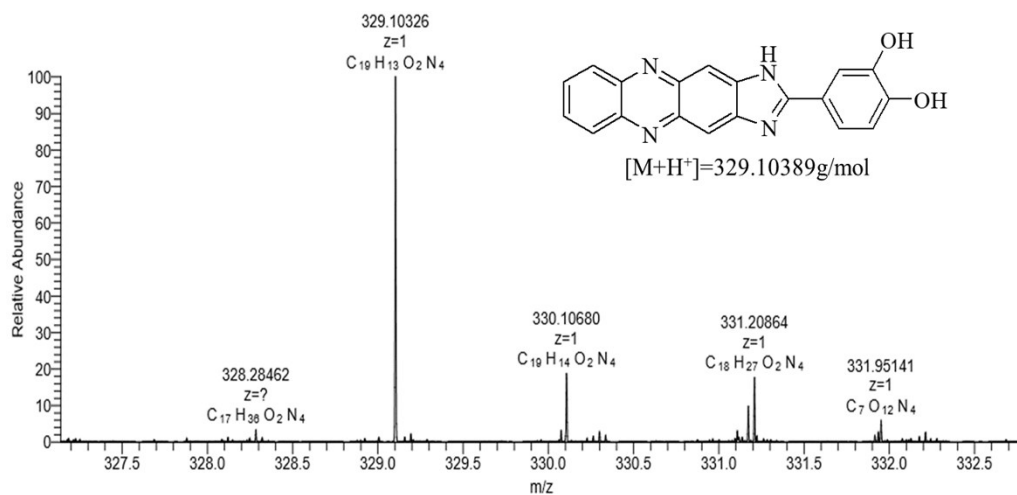

Figure S4 The ESI-MS of PD:  $[M+H]^+ = 329.10326$  (ESI-MS m/z:  $[M+H]^+$  Calcd for  $C_{19}H_{12}N_4O_2$  329.10389; Found 329.10326)

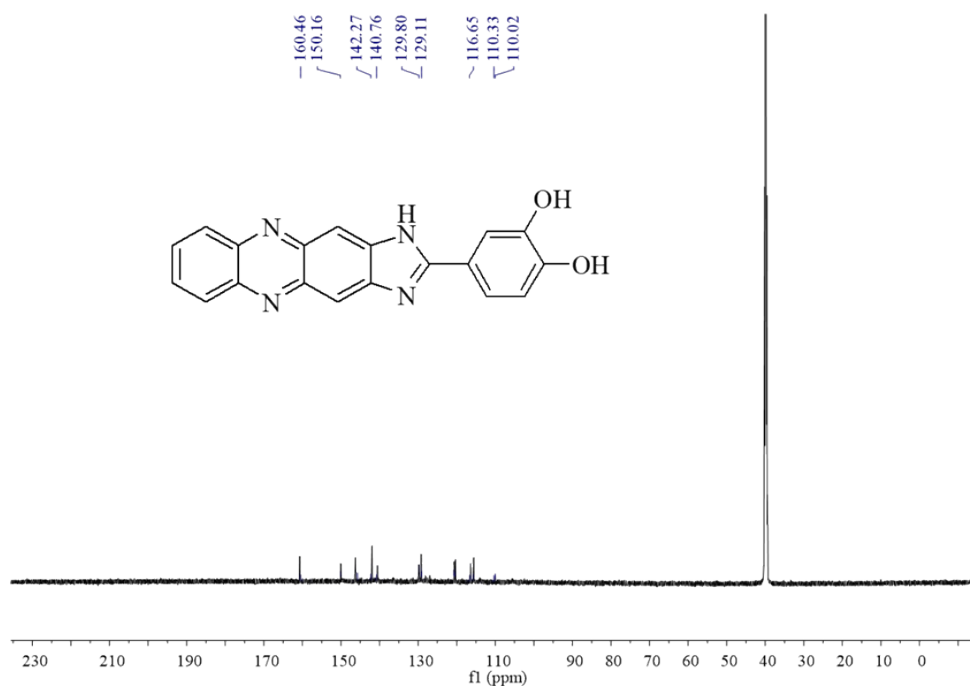

Figure S5  $^{13}C$  NMR spectrum (150 MHz,  $DMSO-d_6$ , 293 K) of PD

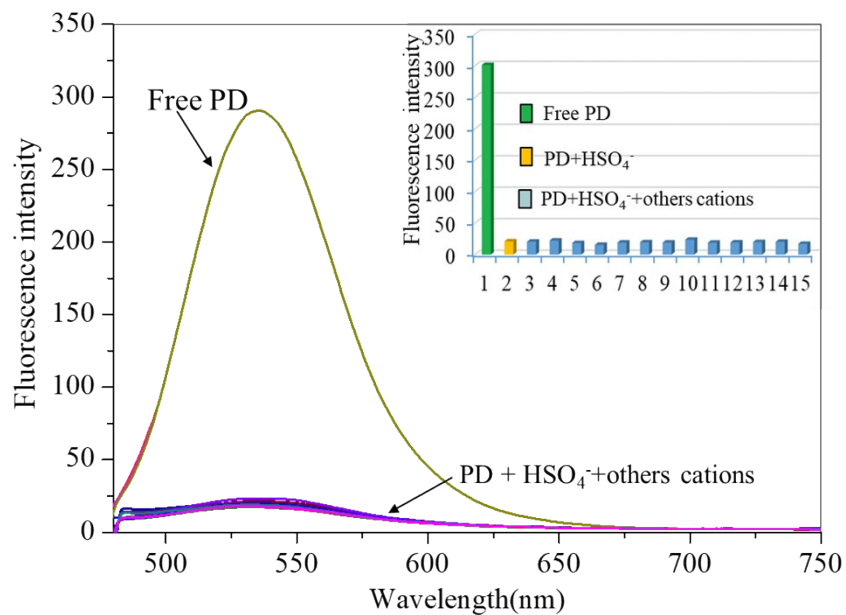

Fig S6. Fluorescence response of the PD-HSO<sub>4</sub><sup>-</sup> in the presence of various caions. From 1 to 15: PD, PD-HSO<sub>4</sub><sup>-</sup>; Zn<sup>2+</sup>, Cd<sup>2+</sup>, Hg<sup>2+</sup>, Co<sup>2+</sup>, Ni<sup>2+</sup>, Al<sup>3+</sup>, Fe<sup>3+</sup>, Cu<sup>2+</sup>, Pb<sup>2+</sup>, Mg<sup>2+</sup>, Ba<sup>2+</sup>, Cr<sup>3+</sup>in three solvent system DMSO/Ethanol/H<sub>2</sub>O (1:8:1, v/v/v) solution

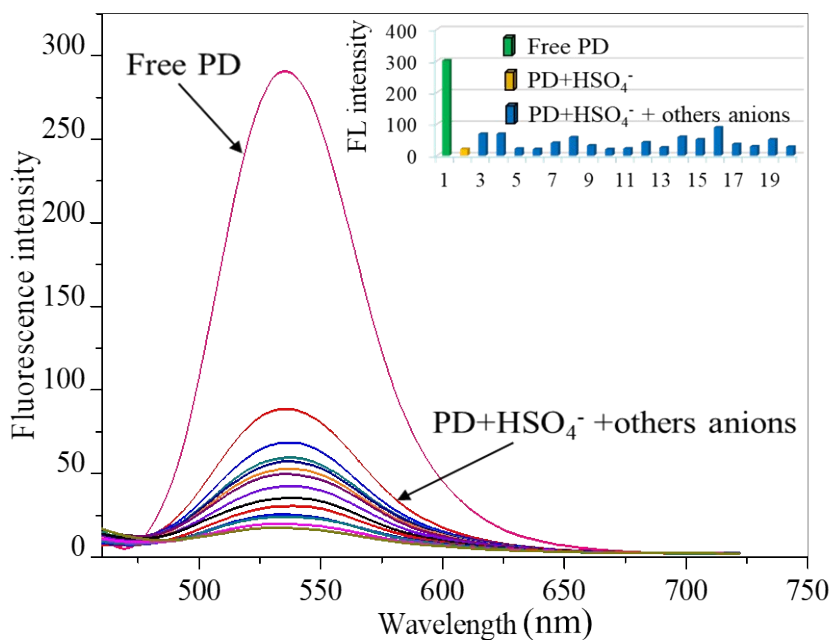

Fig S7. Fluorescence response of the PD- HSO<sub>4</sub><sup>-</sup> in the presence of various anions. From 1 to 20: PD, PD-HSO<sub>4</sub><sup>-</sup>; ClO<sub>4</sub><sup>-</sup>, HSO<sub>4</sub><sup>-</sup>, F<sup>-</sup>, Cl<sup>-</sup>, Br<sup>-</sup>, I<sup>-</sup>, CH<sub>3</sub>COO<sup>-</sup>, H<sub>2</sub>PO<sub>4</sub><sup>-</sup>, CN<sup>-</sup>, SCN<sup>-</sup>,



$\text{NO}_3^-$ ,  $\text{SO}_3^{2-}$ ,  $\text{NO}_2^-$ ,  $\text{P}_2\text{O}_7^{4-}$ ,  $\text{PO}_4^{3-}$ ,  $\text{C}_2\text{O}_4^{2-}$ ,  $\text{S}_2\text{O}_3^{2-}$ ,  $\text{CO}_3^{2-}$ ,  $\text{HPO}_4^{2-}$ ) in three solvent system  
DMSO/Ethanol/ $\text{H}_2\text{O}$  (1:8:1, v/v/v) solution

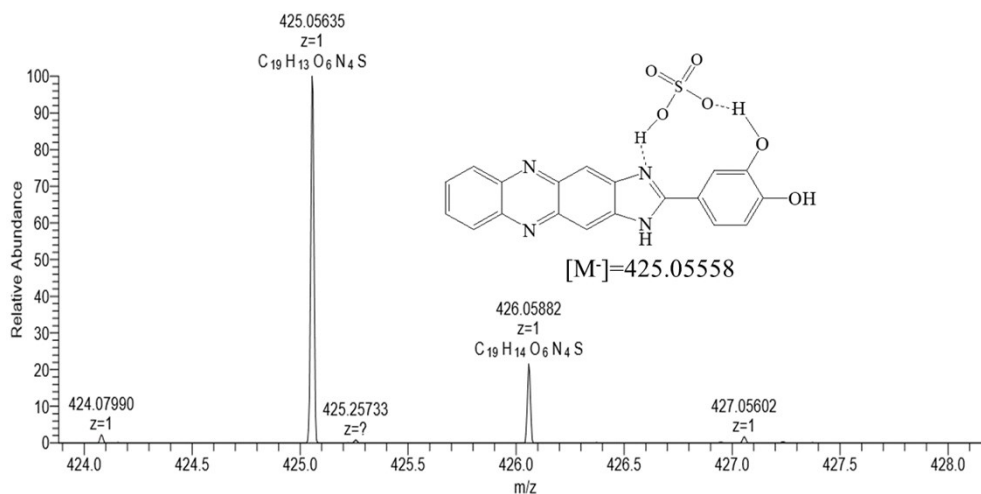

Fig. S8 ESI-MS of  $\text{PD-HSO}_4^-$  [M-]=425.05635 (ESI-MS m/z: [M-]Calcd for  $\text{C}_{19}\text{H}_{13}\text{N}_4\text{O}_6\text{S}$  425.05558; Found 425.05635)

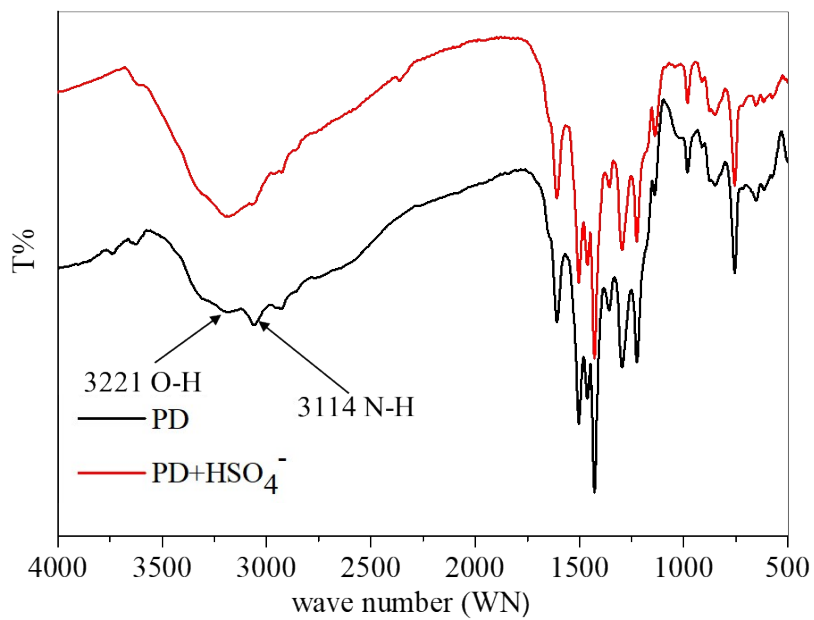

Fig S9 IR spectrum of  $\text{PD-HSO}_4^-$  complex

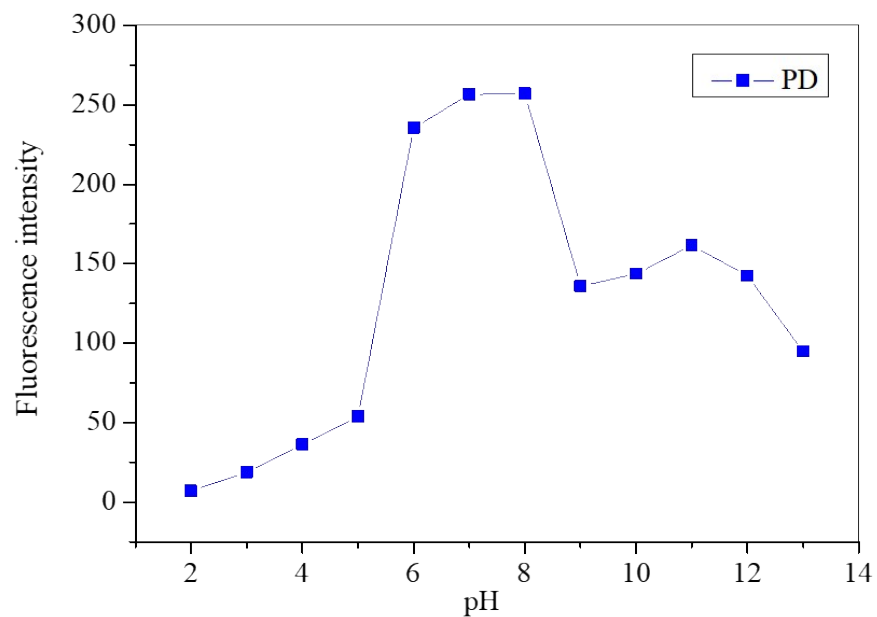

Fig S10 The pH-Dependent fluorescence responses of PD ( $2 \times 10^{-5}$  M) (pH from 1 to 13).

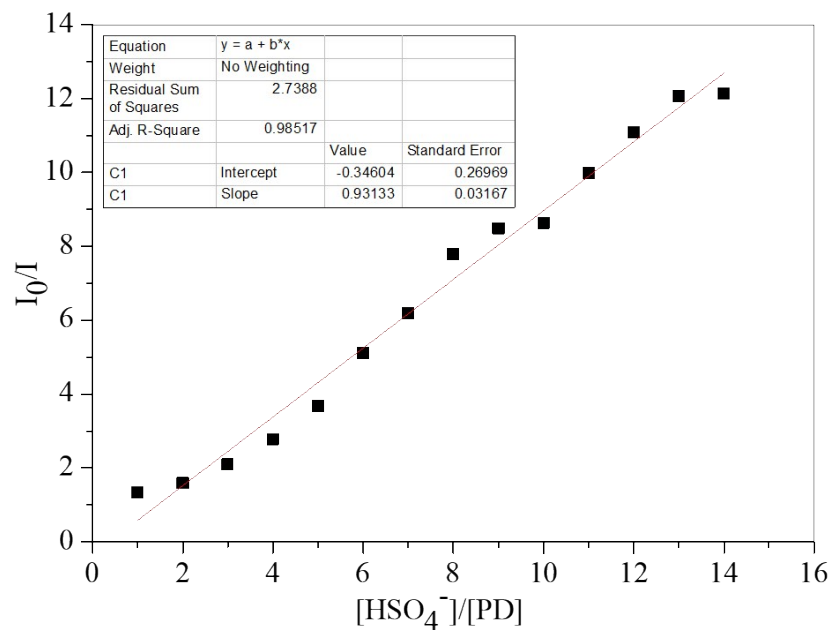

Fig S11 The linear fitting equation and the detection limit of PD to the  $\text{HSO}_4^-$

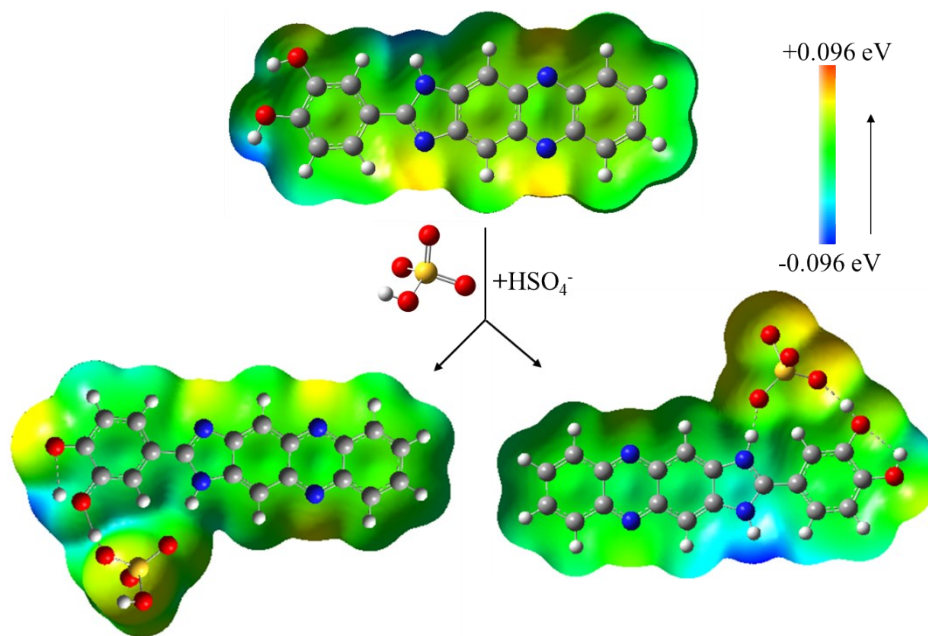

Fig S12 A diagrammatic figure of electron density distribution for model 1 (left) and model 2 (right).

**Table S1** The optimization of practical orientation of the molecular structure in spatial distribution for the PD- $\text{HSO}_4^-$  (mode 2)

| Center Number | Atomic Number | Atomic Type | Coordinates (Angstroms) |           |           |
|---------------|---------------|-------------|-------------------------|-----------|-----------|
|               |               |             | X                       | Y         | Z         |
| 1             | 6             | 0           | -7.804625               | 1.286816  | -0.010912 |
| 2             | 6             | 0           | -6.500231               | 1.705173  | -0.019335 |
| 3             | 6             | 0           | -5.443493               | 0.745517  | -0.014882 |
| 4             | 6             | 0           | -5.770287               | -0.664498 | -0.001038 |
| 5             | 6             | 0           | -7.141486               | -1.059530 | 0.007336  |

|    |   |   |           |           |           |
|----|---|---|-----------|-----------|-----------|
| 6  | 6 | 0 | -8.127945 | -0.108545 | 0.002426  |
| 7  | 6 | 0 | -3.509145 | -1.189921 | -0.004615 |
| 8  | 6 | 0 | -3.180353 | 0.226122  | -0.019162 |
| 9  | 6 | 0 | -1.822826 | 0.654793  | -0.030226 |
| 10 | 1 | 0 | -1.597142 | 1.709858  | -0.041848 |
| 11 | 6 | 0 | -0.862554 | -0.320884 | -0.026042 |
| 12 | 6 | 0 | -1.187128 | -1.718113 | -0.008247 |
| 13 | 6 | 0 | -2.477576 | -2.172263 | 0.001820  |
| 14 | 1 | 0 | -8.606799 | 2.011765  | -0.014242 |
| 15 | 1 | 0 | -6.224613 | 2.749505  | -0.029433 |
| 16 | 1 | 0 | -7.356104 | -2.118180 | 0.017553  |
| 17 | 1 | 0 | -9.167499 | -0.406218 | 0.008761  |
| 18 | 1 | 0 | -2.757038 | -3.214816 | 0.014337  |
| 19 | 7 | 0 | -4.800387 | -1.605849 | 0.003925  |
| 20 | 7 | 0 | -4.159787 | 1.165171  | -0.023758 |
| 21 | 7 | 0 | 0.536805  | -0.241963 | -0.032606 |
| 22 | 6 | 0 | 1.078733  | -1.481284 | -0.025141 |
| 23 | 7 | 0 | 0.049954  | -2.386229 | -0.008318 |
| 24 | 1 | 0 | 0.170482  | -3.382162 | -0.042965 |
| 25 | 6 | 0 | 2.485497  | -1.783801 | -0.023736 |
| 26 | 6 | 0 | 3.395930  | -0.731905 | -0.273996 |
| 27 | 6 | 0 | 2.976489  | -3.078217 | 0.253517  |
| 28 | 6 | 0 | 4.755745  | -0.960627 | -0.211640 |
| 29 | 1 | 0 | 3.048314  | 0.256275  | -0.522627 |
| 30 | 6 | 0 | 4.347522  | -3.310450 | 0.286507  |

|    |    |   |          |           |           |
|----|----|---|----------|-----------|-----------|
| 31 | 1  | 0 | 2.306013 | -3.897994 | 0.475490  |
| 32 | 6  | 0 | 5.237523 | -2.259518 | 0.059950  |
| 33 | 8  | 0 | 6.587336 | -2.474132 | 0.106345  |
| 34 | 1  | 0 | 7.060847 | -1.632827 | -0.058267 |
| 35 | 16 | 0 | 3.118768 | 3.021700  | 0.043247  |
| 36 | 8  | 0 | 2.891205 | 4.623989  | -0.518674 |
| 37 | 8  | 0 | 3.376969 | 3.596310  | 1.611626  |
| 38 | 8  | 0 | 4.402836 | 2.283148  | -0.649821 |
| 39 | 1  | 0 | 4.749147 | -4.288593 | 0.503624  |
| 40 | 8  | 0 | 5.728536 | -0.009759 | -0.398944 |
| 41 | 1  | 0 | 5.356010 | 0.911275  | -0.477940 |
| 42 | 1  | 0 | 1.071921 | 0.648422  | -0.024779 |
| 43 | 8  | 0 | 1.758285 | 2.119868  | -0.116760 |

**Table S2** The optimization of Standard orientation of the molecular structure in spatial distribution for the PD-HSO<sub>4</sub><sup>-</sup>(mode 2)

| Center<br>Number | Atomic<br>Number | Atomic<br>Type | Coordinates (Angstroms) |           |           |
|------------------|------------------|----------------|-------------------------|-----------|-----------|
|                  |                  |                | X                       | Y         | Z         |
| 1                | 6                | 0              | -7.804625               | 1.286816  | -0.010912 |
| 2                | 6                | 0              | -6.500231               | 1.705173  | -0.019335 |
| 3                | 6                | 0              | -5.443493               | 0.745517  | -0.014882 |
| 4                | 6                | 0              | -5.770287               | -0.664498 | -0.001038 |
| 5                | 6                | 0              | -7.141486               | -1.059530 | 0.007336  |

|    |   |   |           |           |           |
|----|---|---|-----------|-----------|-----------|
| 6  | 6 | 0 | -8.127945 | -0.108545 | 0.002426  |
| 7  | 6 | 0 | -3.509145 | -1.189921 | -0.004615 |
| 8  | 6 | 0 | -3.180353 | 0.226122  | -0.019162 |
| 9  | 6 | 0 | -1.822826 | 0.654793  | -0.030226 |
| 10 | 1 | 0 | -1.597142 | 1.709858  | -0.041848 |
| 11 | 6 | 0 | -0.862554 | -0.320884 | -0.026042 |
| 12 | 6 | 0 | -1.187128 | -1.718113 | -0.008247 |
| 13 | 6 | 0 | -2.477576 | -2.172263 | 0.001820  |
| 14 | 1 | 0 | -8.606799 | 2.011765  | -0.014242 |
| 15 | 1 | 0 | -6.224613 | 2.749505  | -0.029433 |
| 16 | 1 | 0 | -7.356104 | -2.118180 | 0.017553  |
| 17 | 1 | 0 | -9.167499 | -0.406218 | 0.008761  |
| 18 | 1 | 0 | -2.757038 | -3.214816 | 0.014337  |
| 19 | 7 | 0 | -4.800387 | -1.605849 | 0.003925  |
| 20 | 7 | 0 | -4.159787 | 1.165171  | -0.023758 |
| 21 | 7 | 0 | 0.536805  | -0.241963 | -0.032606 |
| 22 | 6 | 0 | 1.078733  | -1.481284 | -0.025141 |
| 23 | 7 | 0 | 0.049954  | -2.386229 | -0.008318 |
| 24 | 1 | 0 | 0.170482  | -3.382162 | -0.042965 |
| 25 | 6 | 0 | 2.485497  | -1.783801 | -0.023736 |
| 26 | 6 | 0 | 3.395930  | -0.731905 | -0.273996 |
| 27 | 6 | 0 | 2.976489  | -3.078217 | 0.253517  |
| 28 | 6 | 0 | 4.755745  | -0.960627 | -0.211640 |
| 29 | 1 | 0 | 3.048314  | 0.256275  | -0.522627 |
| 30 | 6 | 0 | 4.347522  | -3.310450 | 0.286507  |

|    |    |   |          |           |           |
|----|----|---|----------|-----------|-----------|
| 31 | 1  | 0 | 2.306013 | -3.897994 | 0.475490  |
| 32 | 6  | 0 | 5.237523 | -2.259518 | 0.059950  |
| 33 | 8  | 0 | 6.587336 | -2.474132 | 0.106345  |
| 34 | 1  | 0 | 7.060847 | -1.632827 | -0.058267 |
| 35 | 16 | 0 | 3.118768 | 3.021700  | 0.043247  |
| 36 | 8  | 0 | 2.891205 | 4.623989  | -0.518674 |
| 37 | 8  | 0 | 3.376969 | 3.596310  | 1.611626  |
| 38 | 8  | 0 | 4.402836 | 2.283148  | -0.649821 |
| 39 | 1  | 0 | 4.749147 | -4.288593 | 0.503624  |
| 40 | 8  | 0 | 5.728536 | -0.009759 | -0.398944 |
| 41 | 1  | 0 | 5.356010 | 0.911275  | -0.477940 |
| 42 | 1  | 0 | 1.071921 | 0.648422  | -0.024779 |
| 43 | 8  | 0 | 1.758285 | 2.119868  | -0.116760 |

**Table S3** The optimization of practical orientation of the molecular structure in spatial distribution for the PD-HSO<sub>4</sub><sup>-</sup>(mode 1)

| Center<br>Number | Atomic<br>Number | Atomic<br>Type | Coordinates (Angstroms) |           |           |
|------------------|------------------|----------------|-------------------------|-----------|-----------|
|                  |                  |                | X                       | Y         | Z         |
| 1                | 6                | 0              | -8.158675               | 0.184070  | 0.054010  |
| 2                | 6                | 0              | -7.145585               | 1.111640  | 0.072815  |
| 3                | 6                | 0              | -5.787314               | 0.681977  | 0.034779  |
| 4                | 6                | 0              | -5.494008               | -0.730707 | -0.023781 |

|    |   |   |           |           |           |
|----|---|---|-----------|-----------|-----------|
| 5  | 6 | 0 | -6.566520 | -1.661084 | -0.040972 |
| 6  | 6 | 0 | -7.866839 | -1.211589 | -0.002959 |
| 7  | 6 | 0 | -3.216176 | -0.273048 | -0.045345 |
| 8  | 6 | 0 | -3.511592 | 1.154292  | 0.015455  |
| 9  | 6 | 0 | -2.460272 | 2.104067  | 0.034697  |
| 10 | 1 | 0 | -2.690609 | 3.157207  | 0.081430  |
| 11 | 6 | 0 | -1.153709 | 1.630577  | -0.009147 |
| 12 | 6 | 0 | -0.875822 | 0.209336  | -0.073860 |
| 13 | 6 | 0 | -1.862146 | -0.736757 | -0.089321 |
| 14 | 1 | 0 | -9.190123 | 0.506530  | 0.082789  |
| 15 | 1 | 0 | -7.332827 | 2.174632  | 0.116289  |
| 16 | 1 | 0 | -6.318703 | -2.711485 | -0.084121 |
| 17 | 1 | 0 | -8.683333 | -1.920245 | -0.015989 |
| 18 | 1 | 0 | -1.676191 | -1.798923 | -0.131303 |
| 19 | 7 | 0 | -4.211740 | -1.182155 | -0.063228 |
| 20 | 7 | 0 | -4.793408 | 1.601016  | 0.053907  |
| 21 | 7 | 0 | 0.024649  | 2.339985  | -0.000296 |
| 22 | 6 | 0 | 1.013999  | 1.398022  | -0.065133 |
| 23 | 7 | 0 | 0.511339  | 0.121581  | -0.106059 |
| 24 | 1 | 0 | 1.057924  | -0.760549 | -0.140396 |
| 25 | 6 | 0 | 2.413298  | 1.729581  | -0.069916 |
| 26 | 6 | 0 | 2.811275  | 3.086749  | 0.094951  |
| 27 | 6 | 0 | 3.381998  | 0.731646  | -0.208718 |
| 28 | 6 | 0 | 4.158330  | 3.403710  | 0.135246  |
| 29 | 1 | 0 | 2.051047  | 3.846275  | 0.191157  |



|    |    |   |          |           |           |
|----|----|---|----------|-----------|-----------|
| 30 | 6  | 0 | 4.741804 | 1.031052  | -0.144082 |
| 31 | 1  | 0 | 3.093392 | -0.290645 | -0.382689 |
| 32 | 6  | 0 | 5.131715 | 2.399227  | 0.024020  |
| 33 | 1  | 0 | 4.472528 | 4.432082  | 0.260508  |
| 34 | 8  | 0 | 5.707668 | 0.101026  | -0.224292 |
| 35 | 1  | 0 | 5.342240 | -0.842549 | -0.282698 |
| 36 | 8  | 0 | 6.470737 | 2.649078  | 0.068559  |
| 37 | 1  | 0 | 6.680762 | 3.592386  | 0.188252  |
| 38 | 16 | 0 | 3.259563 | -2.935532 | 0.192833  |
| 39 | 8  | 0 | 3.347077 | -3.244006 | 1.770598  |
| 40 | 8  | 0 | 3.109897 | -4.526327 | -0.684780 |
| 41 | 1  | 0 | 2.335329 | -4.390286 | -1.277108 |
| 42 | 8  | 0 | 4.586462 | -2.236996 | -0.478195 |
| 43 | 8  | 0 | 1.861551 | -2.198457 | -0.331660 |

--

**Table S4** The optimization of Standard orientation of the molecular structure in spatial distribution for the PD-HSO<sub>4</sub><sup>-</sup>(mode 1)

| Center<br>Number | Atomic<br>Number | Atomic<br>Type | Coordinates (Angstroms) |           |          |
|------------------|------------------|----------------|-------------------------|-----------|----------|
|                  |                  |                | X                       | Y         | Z        |
| 1                | 6                | 0              | 8.158675                | -0.184070 | 0.054010 |
| 2                | 6                | 0              | 7.145585                | -1.111640 | 0.072815 |

--

|    |   |   |           |           |           |
|----|---|---|-----------|-----------|-----------|
| 3  | 6 | 0 | 5.787314  | -0.681977 | 0.034779  |
| 4  | 6 | 0 | 5.494008  | 0.730707  | -0.023781 |
| 5  | 6 | 0 | 6.566520  | 1.661084  | -0.040972 |
| 6  | 6 | 0 | 7.866839  | 1.211589  | -0.002959 |
| 7  | 6 | 0 | 3.216176  | 0.273048  | -0.045345 |
| 8  | 6 | 0 | 3.511592  | -1.154292 | 0.015455  |
| 9  | 6 | 0 | 2.460271  | -2.104067 | 0.034697  |
| 10 | 1 | 0 | 2.690609  | -3.157207 | 0.081430  |
| 11 | 6 | 0 | 1.153709  | -1.630577 | -0.009147 |
| 12 | 6 | 0 | 0.875822  | -0.209336 | -0.073860 |
| 13 | 6 | 0 | 1.862146  | 0.736757  | -0.089321 |
| 14 | 1 | 0 | 9.190123  | -0.506530 | 0.082789  |
| 15 | 1 | 0 | 7.332827  | -2.174632 | 0.116289  |
| 16 | 1 | 0 | 6.318703  | 2.711485  | -0.084121 |
| 17 | 1 | 0 | 8.683333  | 1.920245  | -0.015989 |
| 18 | 1 | 0 | 1.676191  | 1.798923  | -0.131303 |
| 19 | 7 | 0 | 4.211740  | 1.182155  | -0.063228 |
| 20 | 7 | 0 | 4.793408  | -1.601016 | 0.053907  |
| 21 | 7 | 0 | -0.024649 | -2.339985 | -0.000296 |
| 22 | 6 | 0 | -1.013999 | -1.398022 | -0.065133 |
| 23 | 7 | 0 | -0.511339 | -0.121581 | -0.106059 |
| 24 | 1 | 0 | -1.057924 | 0.760549  | -0.140396 |
| 25 | 6 | 0 | -2.413298 | -1.729581 | -0.069916 |
| 26 | 6 | 0 | -2.811275 | -3.086749 | 0.094951  |
| 27 | 6 | 0 | -3.381998 | -0.731646 | -0.208718 |

|    |    |   |           |           |           |
|----|----|---|-----------|-----------|-----------|
| 28 | 6  | 0 | -4.158330 | -3.403710 | 0.135246  |
| 29 | 1  | 0 | -2.051047 | -3.846275 | 0.191157  |
| 30 | 6  | 0 | -4.741804 | -1.031052 | -0.144082 |
| 31 | 1  | 0 | -3.093392 | 0.290645  | -0.382689 |
| 32 | 6  | 0 | -5.131715 | -2.399227 | 0.024020  |
| 33 | 1  | 0 | -4.472528 | -4.432082 | 0.260508  |
| 34 | 8  | 0 | -5.707668 | -0.101026 | -0.224292 |
| 35 | 1  | 0 | -5.342240 | 0.842549  | -0.282698 |
| 36 | 8  | 0 | -6.470737 | -2.649078 | 0.068559  |
| 37 | 1  | 0 | -6.680762 | -3.592386 | 0.188252  |
| 38 | 16 | 0 | -3.259563 | 2.935532  | 0.192833  |
| 39 | 8  | 0 | -3.347077 | 3.244006  | 1.770598  |
| 40 | 8  | 0 | -3.109897 | 4.526327  | -0.684780 |
| 41 | 1  | 0 | -2.335329 | 4.390286  | -1.277108 |
| 42 | 8  | 0 | -4.586462 | 2.236996  | -0.478195 |
| 43 | 8  | 0 | -1.861551 | 2.198457  | -0.331660 |

**Table S5** The optimization of practical orientation of the molecular structure in spatial distribution for the PD.

---

-

| Center | Atomic | Atomic | Coordinates (Angstroms) |          |           |
|--------|--------|--------|-------------------------|----------|-----------|
| Number | Number | Type   | X                       | Y        | Z         |
| 1      | 6      | 0      | -7.804625               | 1.286816 | -0.010912 |

---

-

|    |   |   |           |           |           |
|----|---|---|-----------|-----------|-----------|
| 2  | 6 | 0 | -6.500231 | 1.705173  | -0.019335 |
| 3  | 6 | 0 | -5.443493 | 0.745517  | -0.014882 |
| 4  | 6 | 0 | -5.770287 | -0.664498 | -0.001038 |
| 5  | 6 | 0 | -7.141486 | -1.059530 | 0.007336  |
| 6  | 6 | 0 | -8.127945 | -0.108545 | 0.002426  |
| 7  | 6 | 0 | -3.509145 | -1.189921 | -0.004615 |
| 8  | 6 | 0 | -3.180353 | 0.226122  | -0.019162 |
| 9  | 6 | 0 | -1.822826 | 0.654793  | -0.030226 |
| 10 | 1 | 0 | -1.597142 | 1.709858  | -0.041848 |
| 11 | 6 | 0 | -0.862554 | -0.320884 | -0.026042 |
| 12 | 6 | 0 | -1.187128 | -1.718113 | -0.008247 |
| 13 | 6 | 0 | -2.477576 | -2.172263 | 0.001820  |
| 14 | 1 | 0 | -8.606799 | 2.011765  | -0.014242 |
| 15 | 1 | 0 | -6.224613 | 2.749505  | -0.029433 |
| 16 | 1 | 0 | -7.356104 | -2.118180 | 0.017553  |
| 17 | 1 | 0 | -9.167499 | -0.406218 | 0.008761  |
| 18 | 1 | 0 | -2.757038 | -3.214816 | 0.014337  |
| 19 | 7 | 0 | -4.800387 | -1.605849 | 0.003925  |
| 20 | 7 | 0 | -4.159787 | 1.165171  | -0.023758 |
| 21 | 7 | 0 | 0.536805  | -0.241963 | -0.032606 |
| 22 | 6 | 0 | 1.078733  | -1.481284 | -0.025141 |
| 23 | 7 | 0 | 0.049954  | -2.386229 | -0.008318 |
| 24 | 1 | 0 | 0.170482  | -3.382162 | -0.042965 |
| 25 | 6 | 0 | 2.485497  | -1.783801 | -0.023736 |
| 26 | 6 | 0 | 3.395930  | -0.731905 | -0.273996 |

|    |    |   |          |           |           |
|----|----|---|----------|-----------|-----------|
| 27 | 6  | 0 | 2.976489 | -3.078217 | 0.253517  |
| 28 | 6  | 0 | 4.755745 | -0.960627 | -0.211640 |
| 29 | 1  | 0 | 3.048314 | 0.256275  | -0.522627 |
| 30 | 6  | 0 | 4.347522 | -3.310450 | 0.286507  |
| 31 | 1  | 0 | 2.306013 | -3.897994 | 0.475490  |
| 32 | 6  | 0 | 5.237523 | -2.259518 | 0.059950  |
| 33 | 8  | 0 | 6.587336 | -2.474132 | 0.106345  |
| 34 | 1  | 0 | 7.060847 | -1.632827 | -0.058267 |
| 35 | 16 | 0 | 3.118768 | 3.021700  | 0.043247  |
| 36 | 8  | 0 | 2.891205 | 4.623989  | -0.518674 |
| 37 | 8  | 0 | 3.376969 | 3.596310  | 1.611626  |
| 38 | 8  | 0 | 4.402836 | 2.283148  | -0.649821 |
| 39 | 1  | 0 | 4.749147 | -4.288593 | 0.503624  |
| 40 | 8  | 0 | 5.728536 | -0.009759 | -0.398944 |
| 41 | 1  | 0 | 5.356010 | 0.911275  | -0.477940 |
| 42 | 1  | 0 | 1.071921 | 0.648422  | -0.024779 |
| 43 | 8  | 0 | 1.758285 | 2.119868  | -0.116760 |

-----  
--

**Table S6** The optimization of standard orientation of the molecular structure in spatial distribution for the PD.

-----  
--

| Center<br>Number | Atomic<br>Number | Atomic<br>Type | Coordinates (Angstroms) |   |   |
|------------------|------------------|----------------|-------------------------|---|---|
|                  |                  |                | X                       | Y | Z |

--

---

|    |   |   |           |           |           |
|----|---|---|-----------|-----------|-----------|
| 1  | 6 | 0 | -7.804625 | 1.286816  | -0.010912 |
| 2  | 6 | 0 | -6.500231 | 1.705173  | -0.019335 |
| 3  | 6 | 0 | -5.443493 | 0.745517  | -0.014882 |
| 4  | 6 | 0 | -5.770287 | -0.664498 | -0.001038 |
| 5  | 6 | 0 | -7.141486 | -1.059530 | 0.007336  |
| 6  | 6 | 0 | -8.127945 | -0.108545 | 0.002426  |
| 7  | 6 | 0 | -3.509145 | -1.189921 | -0.004615 |
| 8  | 6 | 0 | -3.180353 | 0.226122  | -0.019162 |
| 9  | 6 | 0 | -1.822826 | 0.654793  | -0.030226 |
| 10 | 1 | 0 | -1.597142 | 1.709858  | -0.041848 |
| 11 | 6 | 0 | -0.862554 | -0.320884 | -0.026042 |
| 12 | 6 | 0 | -1.187128 | -1.718113 | -0.008247 |
| 13 | 6 | 0 | -2.477576 | -2.172263 | 0.001820  |
| 14 | 1 | 0 | -8.606799 | 2.011765  | -0.014242 |
| 15 | 1 | 0 | -6.224613 | 2.749505  | -0.029433 |
| 16 | 1 | 0 | -7.356104 | -2.118180 | 0.017553  |
| 17 | 1 | 0 | -9.167499 | -0.406218 | 0.008761  |
| 18 | 1 | 0 | -2.757038 | -3.214816 | 0.014337  |
| 19 | 7 | 0 | -4.800387 | -1.605849 | 0.003925  |
| 20 | 7 | 0 | -4.159787 | 1.165171  | -0.023758 |
| 21 | 7 | 0 | 0.536805  | -0.241963 | -0.032606 |
| 22 | 6 | 0 | 1.078733  | -1.481284 | -0.025141 |
| 23 | 7 | 0 | 0.049954  | -2.386229 | -0.008318 |
| 24 | 1 | 0 | 0.170482  | -3.382162 | -0.042965 |

|    |    |   |          |           |           |
|----|----|---|----------|-----------|-----------|
| 25 | 6  | 0 | 2.485497 | -1.783801 | -0.023736 |
| 26 | 6  | 0 | 3.395930 | -0.731905 | -0.273996 |
| 27 | 6  | 0 | 2.976489 | -3.078217 | 0.253517  |
| 28 | 6  | 0 | 4.755745 | -0.960627 | -0.211640 |
| 29 | 1  | 0 | 3.048314 | 0.256275  | -0.522627 |
| 30 | 6  | 0 | 4.347522 | -3.310450 | 0.286507  |
| 31 | 1  | 0 | 2.306013 | -3.897994 | 0.475490  |
| 32 | 6  | 0 | 5.237523 | -2.259518 | 0.059950  |
| 33 | 8  | 0 | 6.587336 | -2.474132 | 0.106345  |
| 34 | 1  | 0 | 7.060847 | -1.632827 | -0.058267 |
| 35 | 16 | 0 | 3.118768 | 3.021700  | 0.043247  |
| 36 | 8  | 0 | 2.891205 | 4.623989  | -0.518674 |
| 37 | 8  | 0 | 3.376969 | 3.596310  | 1.611626  |
| 38 | 8  | 0 | 4.402836 | 2.283148  | -0.649821 |
| 39 | 1  | 0 | 4.749147 | -4.288593 | 0.503624  |
| 40 | 8  | 0 | 5.728536 | -0.009759 | -0.398944 |
| 41 | 1  | 0 | 5.356010 | 0.911275  | -0.477940 |
| 42 | 1  | 0 | 1.071921 | 0.648422  | -0.024779 |
| 43 | 8  | 0 | 1.758285 | 2.119868  | -0.116760 |

---

**Complete Reference for Gaussian (Reference 10 in manuscript)**

Gaussian 09, Revision B.01, M. J. Frisch, G. W. Trucks, H. B. Schlegel, G. E. Scuseria, M. A.

Robb, J. R. Cheeseman, G. Scalmani, V. Barone, B. Mennucci, G. A. Petersson, H. Nakatsuji, M.

Caricato, X. Li, H. P. Hratchian, A. F. Izmaylov, J. Bloino, G. Zheng, J. L. Sonnenberg, M. Hada,

M. Ehara, K. Toyota, R. Fukuda, J. Hasegawa, M. Ishida, T. Nakajima, Y. Honda, O. Kitao, H.

Nakai, T. Vreven, J. A. Montgomery Jr., J. E. Peralta, F. Ogliaro, M. Bearpark, J. J. Heyd, E.

Brothers, K. N. Kudin, V. N. Staroverov, T. Keith, R. Kobayashi, J. Normand, K. Raghavachari,

A. Rendell, J. C. Burant, S. S. Iyengar, J. Tomasi, M. Cossi, N. Rega, J. M. Millam, M. Klene, J.

E. Knox, J. B. Cross, V. Bakken, C. Adamo, J. Jaramillo, R. Gomperts, R. E. Stratmann, O.

Yazyev, A. J. Austin, R. Cammi, C. Pomelli, J. W. Ochterski, R. L. Martin, K. Morokuma, V. G.

Zakrzewski, G. A. Voth, P. Salvador, J. J. Dannenberg, S. Dapprich, A. D. Daniels, O. Farkas, J.

B. Foresman, J. V. Ortiz, J. Cioslowski and D. J. Fox, Gaussian, Inc., Wallingford CT, 2010.

**Reference:**

[1] A. M. Amer, A. A. El-Bahnasawi, M. R. H. Mahran, M. Lapib. *fuel Chemie*,1999,130, 1217–1225.

[2] G. Y. Gao, W. J. Qu, B. B. Shi, P. Zhang, Q. Lin,H. Yao. T. B. Wei. *Spectro Acta Part A: Mol. Bio. Spe.*2014,121,514-519.

[3] T. B. Wei, B. R. Yong, L. R. Dang, Y. M. Zhang, H. Yao, Q. Lin. *Dyes Pig.*,2019,171,107707.
